# Supplementary material
Source: PubMed Central journal article supplement (PMC3811404)
Supplement: AAC.00152-13_zac010132211so1.pdf [file AAC.00152-13_zac010132211so1.pdf]

Supplementary FIG. 1.

A

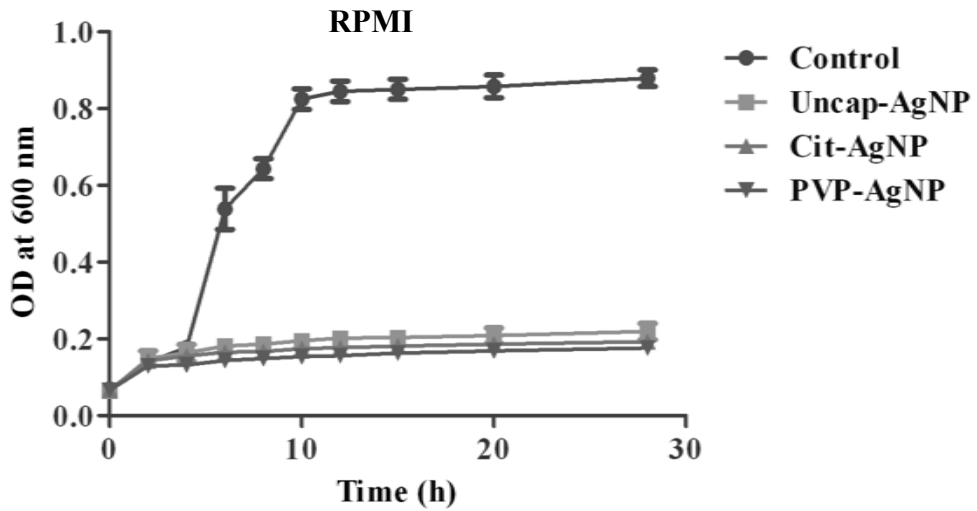

Growth curve of STM was tested in RPMI media (without serum) by sub culturing overnight LB broth grown STM in 1:100 in respective media.

B

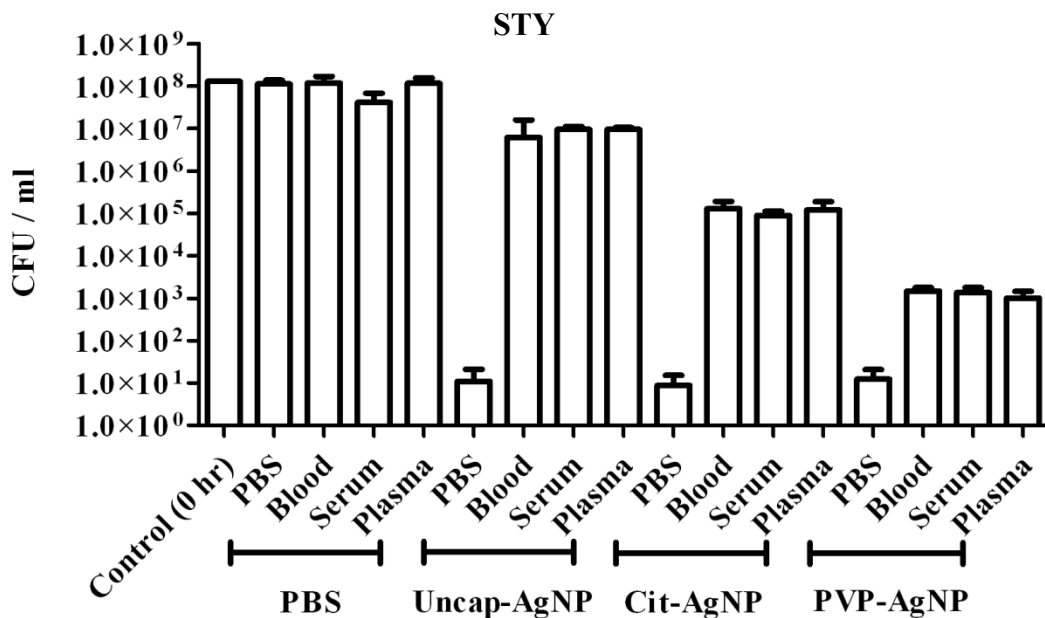

Antibacterial effect of different AgNPs to *S. Typhi* was tested in the presence of different components of human blood (whole blood, serum and plasma). Different AgNPs were incubated with these components for 2 h, serially diluted and plated in LB agar to check the antibacterial effect.

## Supplementary FIG. 2.

### Control

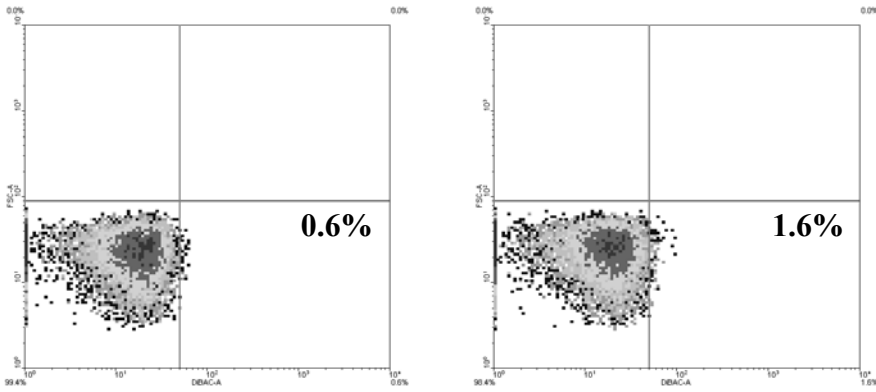

### Uncap-AgNPs & BSA (-)

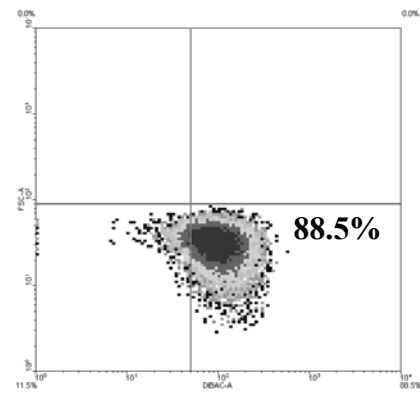

### Cit-AgNPs & BSA (-)

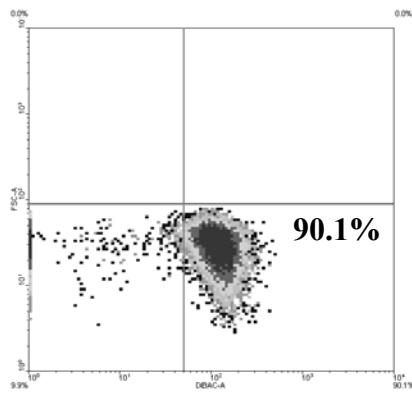

### PVP-AgNPs & BSA (-)

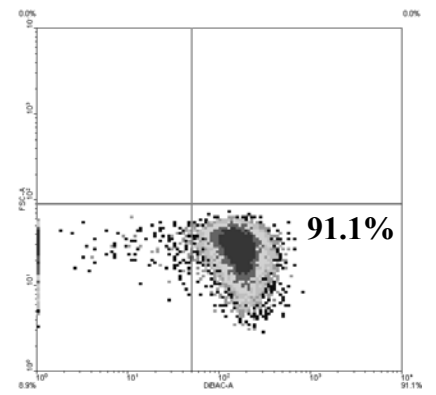

### Uncap-AgNPs & BSA (+)

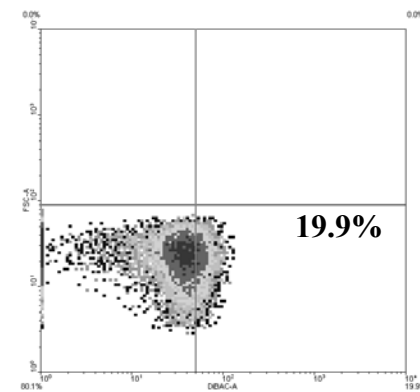

### Cit-AgNPs & BSA (+)

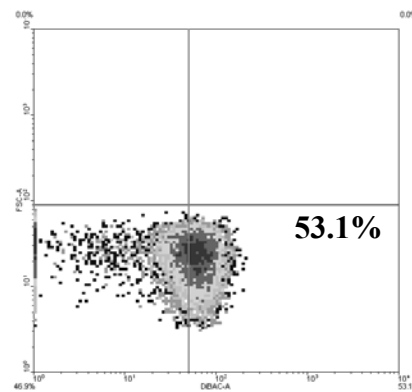

### PVP-AgNPs & BSA (+)

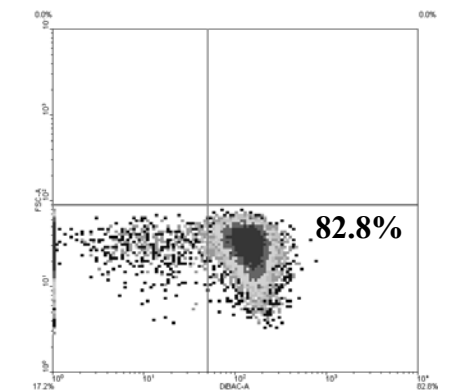

STM was incubated with different AgNPs in the presence and absence of 3% BSA for 2h and stained with DiBAC. DiBAC positive cells are quantified by flow cytometry. Flow-cytometric data was analyzed with WinMDI 2.9.

**Supplementary FIG. 3.**

**Control**

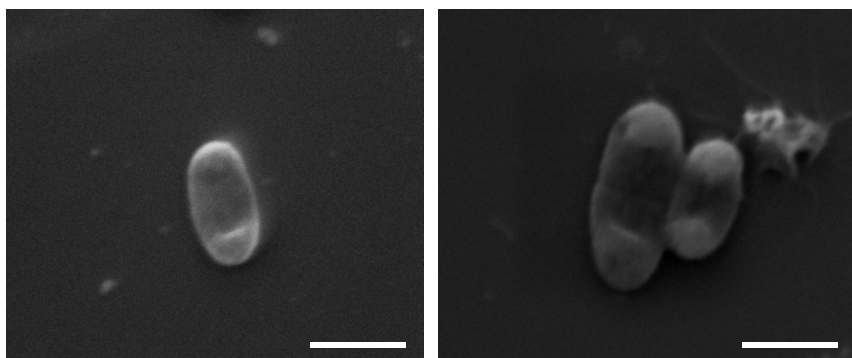

**Uncap-AgNPs & BSA (-)**

**Cit-AgNPs & BSA (-)**

**PVP-AgNPs & BSA (-)**

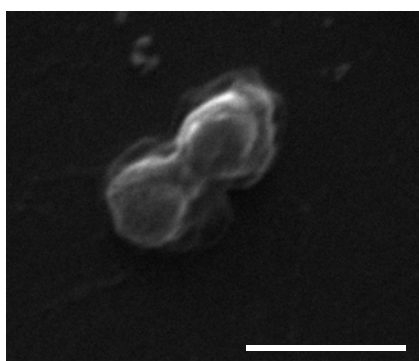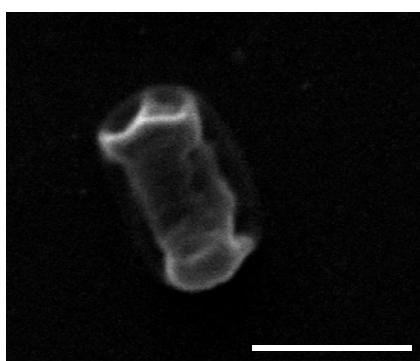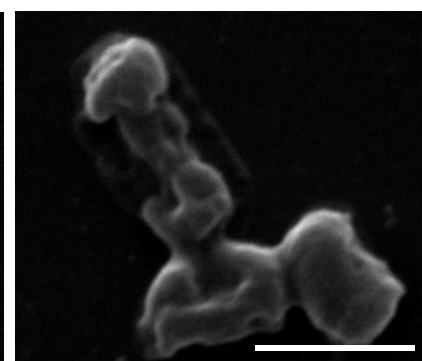

**Uncap-AgNPs & BSA (+)**

**Cit-AgNPs & BSA (+)**

**PVP-AgNPs & BSA (+)**

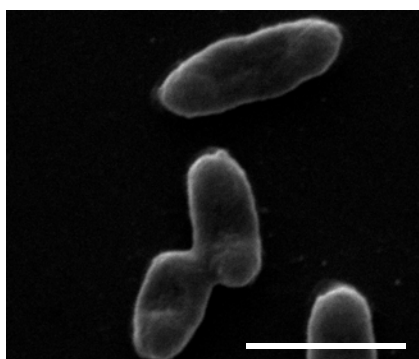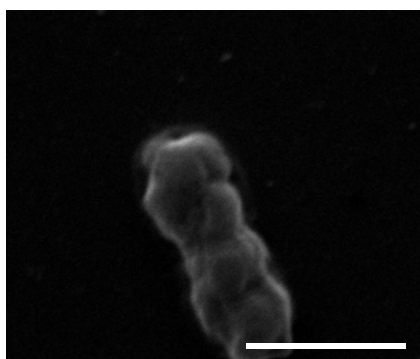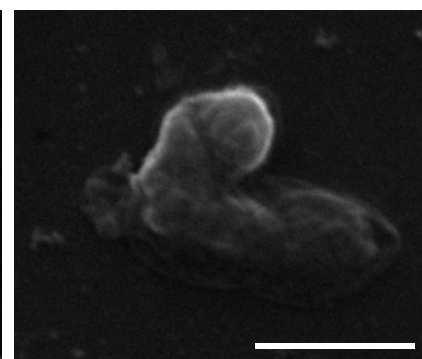

**STM was incubated in the presence and absence of 3% BSA with uncap-AgNPs, cit-AgNPs and PVP-AgNPs and imaged with SEM for the visual damage caused by AgNPs. Scale bar – 2 $\mu$ m**

Supplementary FIG. 4.

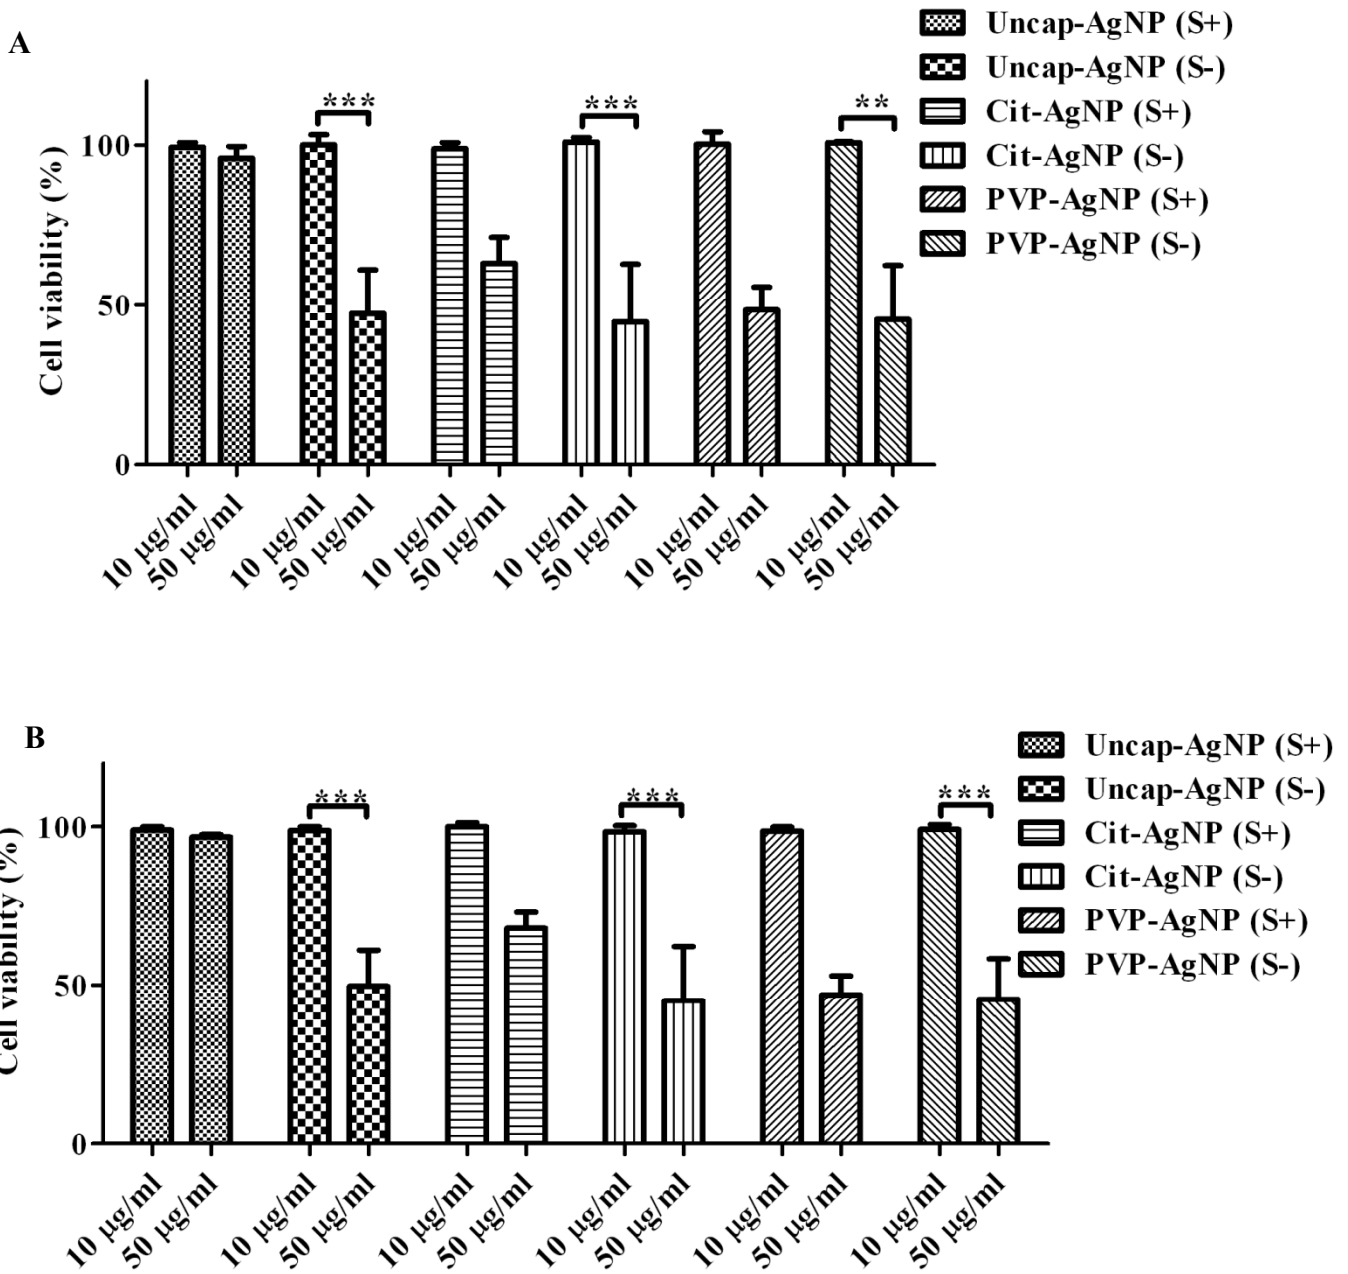

For trypan blue exclusion assay. RAW 264.7 (A) and Intestine 407 (B) were seeded in a 24 well plate ( $1 \times 10^5$  cells). The cells were incubated with 10  $\mu\text{g/ml}$  and 50  $\mu\text{g/ml}$  concentrations of AgNPs in the presence and absence of serum (10%) for 24 h in DMEM. 0.4% trypan blue was added to the cells and incubated for 3 min at room temperature. The number of dye-excluding cells were counted using hemocytometer. Values that are significantly different by Student's *t* test are indicated by the bracket and asterisks as follows: \*\*,  $P < 0.05$ , \*\*\*,  $P < 0.0005$ .

Supplementary FIG. 5.

A

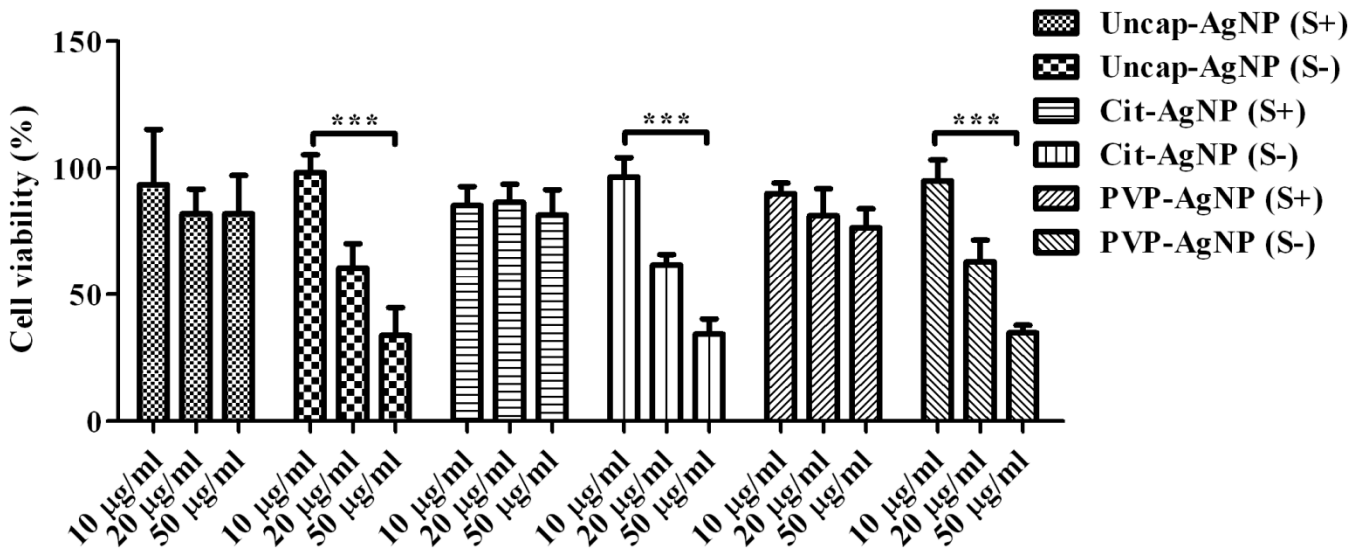

B

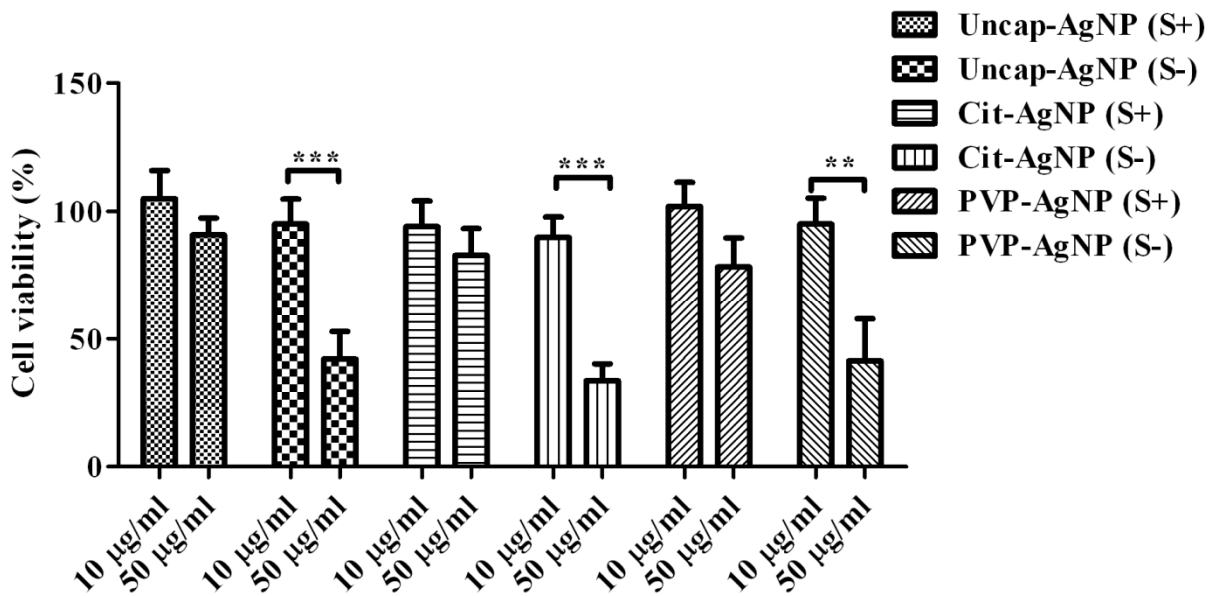

MTT assay for cytotoxic assessment in RAW 264.7 (A) and Intestine 407 (B) cell lines. Cells were incubated with different AgNPs in the presence (S+) and absence (S-) of serum for 24 h and cytotoxicity effect of different concentration of AgNPs were checked using MTT assay. Values that are significantly different by Student's *t* test are indicated by the bracket and asterisks as follows: \*\*,  $P < 0.05$ , \*\*\*,  $P < 0.0005$ .
